# Supplementary material for: Pulmonary function changes after thoracoscopic lobectomy versus intentional thoracoscopic segmentectomy for early-stage non-small cell lung cancer
Source: PubMed Central journal article supplement — Transl Lung Cancer Res. 2021 Nov;10(11):4141–51. doi: 10.21037/tlcr-21-661 (PMC8674599; doi:10.21037/tlcr-21-661), 2021-11
Supplement: tlcr-10-11-4141-supplementary.pdf [file tlcr-10-11-4141-supplementary.pdf]

**Table S1** Surgical procedures in patients receiving VATS lobectomy and VATS segmentectomy

| Variables                                                          | Lobectomy (n=338) | Segmentectomy (n=321) | Segments contained | Resection extent index | P value* |
|--------------------------------------------------------------------|-------------------|-----------------------|--------------------|------------------------|----------|
| Location and procedures                                            |                   |                       |                    |                        | <0.001   |
| RUL                                                                | 166 (49.1%)       | 78 (24.3%)            | 3                  | 1.00                   |          |
| S <sub>1</sub>                                                     | –                 | 36                    | 1                  | 0.33                   |          |
| S <sub>2</sub>                                                     | –                 | 30                    | 1                  | 0.33                   |          |
| S <sub>1</sub> + S <sub>2</sub>                                    | –                 | 1                     | 2                  | 0.67                   |          |
| S <sub>3</sub>                                                     | –                 | 11                    | 1                  | 0.33                   |          |
| RLL                                                                | 75 (22.2%)        | 50 (15.6%)            | 5                  | 1.00                   |          |
| S <sub>6</sub>                                                     | –                 | 33                    | 1                  | 0.20                   |          |
| S <sub>7</sub>                                                     | –                 | 1                     | 1                  | 0.20                   |          |
| S <sub>8</sub>                                                     | –                 | 1                     | 1                  | 0.20                   |          |
| S <sub>7</sub> + S <sub>8</sub>                                    | –                 | 10                    | 2                  | 0.40                   |          |
| S <sub>9</sub> + S <sub>10</sub>                                   | –                 | 4                     | 2                  | 0.40                   |          |
| S <sub>7</sub> + S <sub>8</sub> + S <sub>9</sub> + S <sub>10</sub> | –                 | 1                     | 4                  | 0.80                   |          |
| LUL                                                                | 48 (14.2%)        | 157 (48.9%)           | 4                  | 1.00                   |          |
| S <sub>1+2</sub>                                                   | –                 | 42                    | 1                  | 0.25                   |          |
| S <sub>1+2</sub> + S <sub>3</sub>                                  | –                 | 79                    | 2                  | 0.50                   |          |
| S <sub>3</sub>                                                     | –                 | 15                    | 1                  | 0.25                   |          |
| S <sub>4</sub> + S <sub>5</sub>                                    | –                 | 21                    | 2                  | 0.50                   |          |
| LLL                                                                | 49 (14.5%)        | 36 (11.2%)            | 4                  | 1.00                   |          |
| S <sub>6</sub>                                                     | –                 | 19                    | 1                  | 0.25                   |          |
| S <sub>8</sub>                                                     | –                 | 12                    | 1                  | 0.25                   |          |
| S <sub>9</sub> + S <sub>10</sub>                                   | –                 | 5                     | 2                  | 0.50                   |          |

\*, P value for the difference in tumor location between lobectomy and segmentectomy. RUL, right upper lobe; RLL, right lower lobe; LUL, left upper lobe; LLL, left lower lobe; VATS, video-assisted thoracic surgery.

**Table S2** The ratio of observed to expected (O/E ratio) postoperative pulmonary function loss according to the number of resected segments in patients receiving VATS lobectomy and VATS segmentectomy

| Number of resected segments | Lobectomy                    |                              |                              | Segmentectomy                |                              |                              |
|-----------------------------|------------------------------|------------------------------|------------------------------|------------------------------|------------------------------|------------------------------|
|                             | FVC                          | FEV1                         | DLCO                         | FVC                          | FEV1                         | DLCO                         |
| 1                           | NA                           | NA                           | NA                           | 1.918±1.529<br>(1.705–2.131) | 2.378±1.493<br>(2.170–2.586) | 1.600±2.313<br>(1.272–1.929) |
| 2                           | NA                           | NA                           | NA                           | 1.291±0.741<br>(1.157–1.425) | 1.515±0.706<br>(1.387–1.642) | 1.057±0.981<br>(0.871–1.243) |
| 3                           | 0.989±0.640<br>(0.891–1.087) | 1.129±0.639<br>(1.031–1.227) | 0.676±0.772<br>(0.554–0.798) | NA                           | NA                           | NA                           |
| 4                           | 0.833±0.473<br>(0.737–0.928) | 0.874±0.477<br>(0.778–0.970) | 0.668±0.593<br>(0.544–0.792) | 0.785                        | 0.612                        | 0.851                        |
| 5                           | 0.713±0.374<br>(0.626–0.799) | 0.661±0.351<br>(0.580–0.742) | 0.607±0.441<br>(0.505–0.709) | NA                           | NA                           | NA                           |

The results are expressed as mean ± standard deviation (95% CI). CI, confidence interval; DLCO, diffusing capacity of the lungs for carbon monoxide; FEV1, forced expiratory volume in 1 second; FVC, forced vital capacity; NA, not available; VATS, video-assisted thoracic surgery.

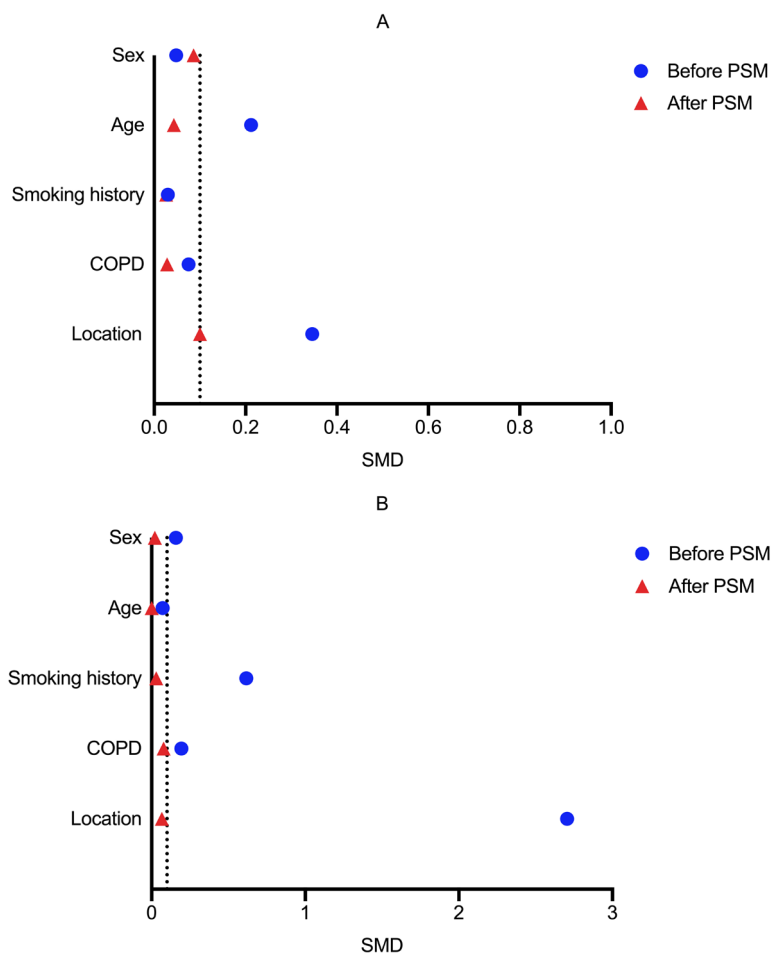

**Figure S1** Evaluation of baseline variable balance by standardized mean difference before and after propensity score matching. (A) Comparison between lobectomy and segmentectomy with a resection extent index  $< 0.5$ . (B) Comparison between lobectomy and segmentectomy with a resection extent index  $\geq 0.5$ . The SMD value no more than 0.1 (within the dotted lines) represents a high degree of balance. COPD, chronic obstructive pulmonary disease; PSM, propensity score matching; SMD, standardized mean difference.

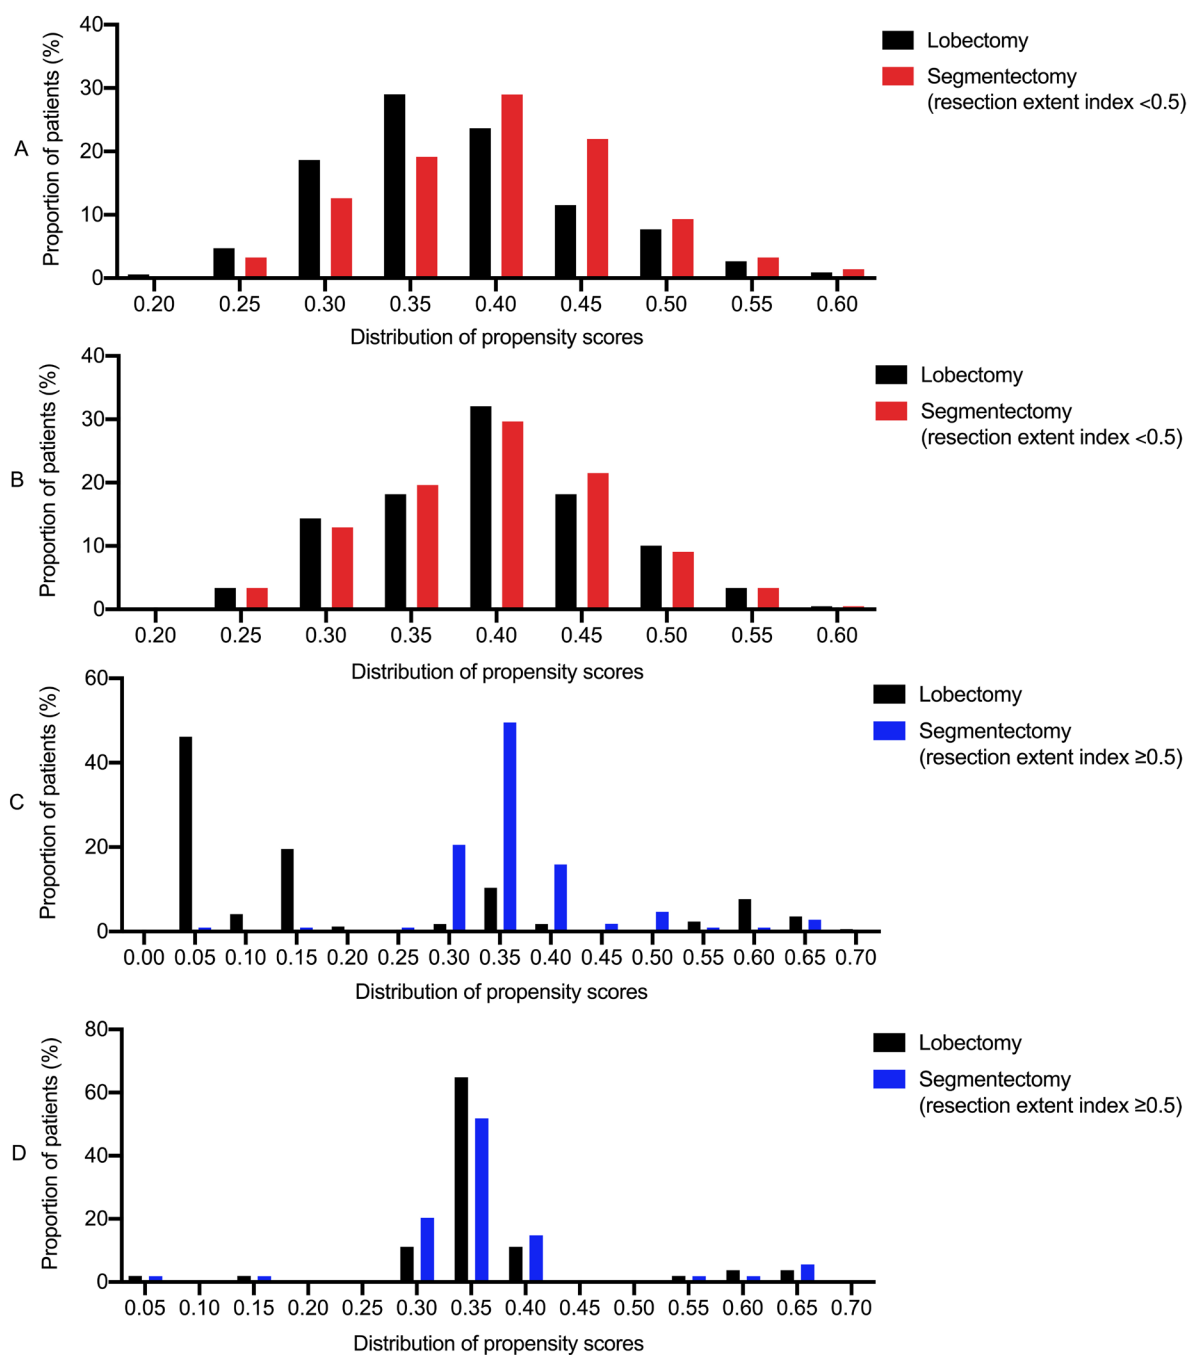

**Figure S2** The distribution of propensity scores before (A,C) and after (B,D) propensity score matching.
